# Supplementary material for: Muscle contraction phenotypic analysis enabled by optogenetics reveals functional relationships of sarcomere components in Caenorhabditis elegans
Source: PubMed Central journal article supplement (PMC4731793; doi:10.1038/srep19900), 2016-01-29
Supplement: srep19900-s1.pdf [file srep19900-s1.pdf]

## Supplementary Information

### **Behavioral phenotypic analysis enabled by optogenetics reveals functional relationships of sarcomere components in *Caenorhabditis elegans***

Hyundoo Hwang<sup>1</sup>, Dawn E. Barnes<sup>2</sup>, Yohei Matsunaga<sup>2</sup>, Guy M. Benian<sup>2</sup>, Shoichiro Ono<sup>2</sup>, Hang Lu<sup>1,3,4</sup>

<sup>1</sup>*School of Chemical & Biomolecular Engineering, Georgia Institute of Technology, Atlanta, GA, USA,* <sup>2</sup>*Department of Pathology, Emory University, Atlanta, GA, USA,* <sup>3</sup>*Interdisciplinary Program of Bioengineering, Georgia Institute of Technology, Atlanta, GA, USA,* <sup>4</sup>*The Petit Institute for Bioengineering and Biosciences, Georgia Institute of Technology, Atlanta, GA, USA.*

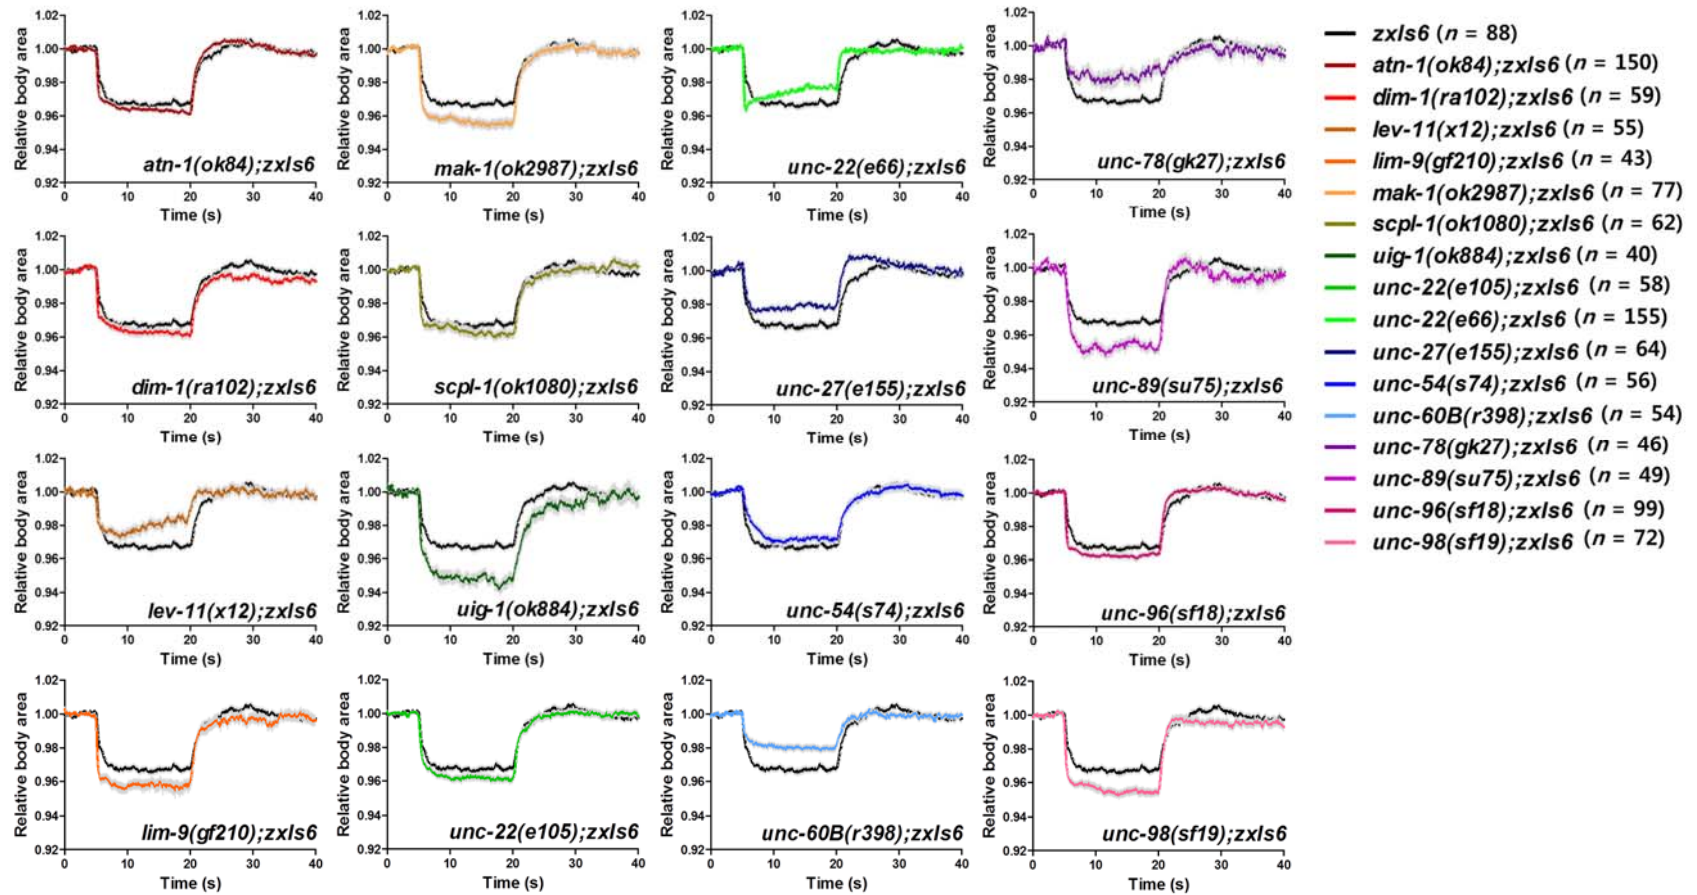

**Supplementary Figure 1 | Body size changes of the *C. elegans* sarcomere mutant strains due to the optogenetically-induced muscle contraction.** All the data are plotted in comparison with the wild-type (black solid line). Blue light was illuminated 5 s after starting the experiments for 15 s, and the body sizes were normalized by the average values of the first 5 s of each measurement. Data represent mean  $\pm$  s.e.m.  $n \geq 40$ .
